# Supplementary material
Source: publisher site journal article supplement (http://static.cambridge.org/content/id/urn:cambridge.org:id:article:S1355617719000456/resource/name/S1355617719000456supp001.docx)
Supplement: Supplementary file 1 [file S1355617719000456supp001.docx]

| Study | Test | Hedge’s g (95% CI) |
| --- | --- | --- |
| Coleman et al., 2002 | Color Trails-2 | 0.55 (0.079, 1.02) |
| Coleman et al., 2002 | Letter Number Sequencing | 0.39 (-0.081, 0.85) |
| Coleman et al., 2002 | Color Trails-1 | 0.83 (0.35, 1.31) |
| Cullen et al., 2014 | Trail Making Test-B | 0.97 (0.32, 1.63) |
| Cullen et al., 2014 | Digit Span backwards | 0.62 (-0.022, 1.25) |
| Cullen et al., 2014 | Trail Making Test-A | 0.93 (0.27, 1.58) |
| Cyr et al., 2009 | Trail Making Test-B | 0.90 (-0.20, 2.01) |
| Cyr et al., 2009 | Digit Span backwards | 0.47 (-0.56, 1.49) |
| Cyr et al., 2009 | Useful Field of Vision divided attention | 0.53 (-0.50, 1.57) |
| Cyr et al., 2009 | Useful Field of Vision selective attention | 0.83 (-0.25, 1.91) |
| Cyr et al., 2009 | Mental Control | 0.25 (-0.75, 1.25) |
| Cyr et al., 2009 | Verbal Paired Associates | 0.13 (-0.86, 1.13) |
| Cyr et al., 2009 | Logical Memory-I | 0.25 (-0.75, 1.25) |
| Cyr et al., 2009 | Simple Reaction Time | 0.41 (-0.61, 1.43) |
| Cyr et al., 2009 | Choice Reaction Time | 0.56 (-0.46, 1.61) |
| Cyr et al., 2009 | Useful Field of Vision processing speed | 0.23 (-0.77, 1.23) |
| Korteling et al., 1996 | Processing Speed task | 0.57 (-0.11, 1.25) |
| Novack et al., 2006 | Useful Field of Vision divided attention | 1.37 (0.75, 1.99) |
| Novack et al., 2006 | Useful Field of Vision selective attention | 0.89 (0.33, 1.45) |
| Novack et al., 2006 | Trail Making Test-B | 1.27 (0.66, 1.88) |
| Novack et al., 2006 | Trail Making Test-A | 0.34 (-0.18, 0.86) |
| Pietrapiana et al., 2005 | Symbol Digit Modalities Test | -0.064 (-0.79, 0.66) |
| Pietrapiana et al., 2005 | Visual Search Test | 0.01 (-0.71, 0.73) |
| Radford et al., 2004 | Paced Auditory Serial Addition Test-1 | 0.056 (-0.55, 0.66) |
| Radford et al., 2004 | Paced Auditory Serial Addition Test-2 | 0.22 (-0.39, 0.82) |
| Radford et al., 2004 | Stroop task | 1.54 (0.87, 2.21) |
| Radford et al., 2004 | Story Recall task | 0.59 (-0.026, 1.2) |
| Radford et al., 2004 | List Learning task | 0.46 (-0.15, 1.067) |
| Radford et al., 2004 | Design Learning task | 0.076 (-0.53, 0.68) |
| Radford et al., 2004 | Figure Learning immediate | 0.51 (-0.10, 1.12) |
| Radford et al., 2004 | Figure Learning delay | 0.38 (0.21, 1.0) |
| Radford et al., 2004 | Dot Cancellation (time) | 0.84 (0.21, 1.46) |
| Radford et al., 2004 | Information processing A | 1.029 (0.39, 1.66) |
| Radford et al., 2004 | Information processing B | 1.1 (0.46, 1.74) |
| Schneider et al., 2005 | Useful Field of Vision selective attention | 0.34 (-0.30, 0.98) |
| Sommer et al., 2010 | Simple Reaction Time task | -1.19 (-0.67, 0.29) |
| Sommer et al., 2010 | Choice Reaction Time task | 0.65 (0.14, 1.15) |
| Gooden et al., 2017 | Symbol Digit Modalities Test | 0.4 (-0.27, 1.07) |
| Gooden et al., 2017 | Trail Making Test-B | -0.037 (-0.7, 0.63) |
| Gooden et al., 2017 | Hayling Sentence Completion | 0.18 (-0.49, 0.84) |
| Gooden et al., 2017 | Zoo map | -0.031 (-0.7, 0.63) |
| McKay et al., 2016 | Rey Auditory Verbal Learning Test learning | 0.4 (-0.086, 0.88) |
| McKay et al., 2016 | Rey Auditory Verbal Learning Test delay | 0.35 (-0.13, 0.83) |
| McKay et al., 2016 | Rey Complex Figure Test delay | 0.62 (0.13, 1.11) |
| McKay et al., 2016 | Digit Span | 0.55 (0.066, 1.03) |
| McKay et al., 2016 | Symbol Digit Modalities Test | 0.35 (-0.14, 0.83) |
| McKay et al., 2016 | Trail Making Test-B | 0.69 (0.2, 1.17) |
